# Supplementary material for: Use of a global model to understand speciated atmospheric mercury observations at five high-elevation sites
Source: Copernicus journal article supplement (doi:10.5194/acp-15-1161-2015), 2015-02-02

Supplement of Atmos. Chem. Phys., 15, 1161–1173, 2015  
<http://www.atmos-chem-phys.net/15/1161/2015/>  
doi:10.5194/acp-15-1161-2015-supplement  
© Author(s) 2015. CC Attribution 3.0 License.

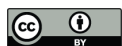

*Supplement of*

## **Use of a global model to understand speciated atmospheric mercury observations at five high-elevation sites**

**P. Weiss-Penzias et al.**

*Correspondence to:* P. Weiss-Penzias (pweiss@ucsc.edu)

Table S-1: Mean daily concentrations and standard deviations for GEM, RM, O<sub>3</sub>, and WV by site and by season for all observations, water-vapor screened observation (WV < 75<sup>th</sup> percentile by season), and modeled data from the standard run. Winter, spring, summer, fall, and are defined as December-February, March-May, June-August, September-November. N refers to the number of daily means used in the calculation for the mean and standard deviation for all parameters.

#### All Observations

| Location  | Season      | N    | GEM  |      | RM   |    | O <sub>3</sub> |     | WV   |     |
|-----------|-------------|------|------|------|------|----|----------------|-----|------|-----|
|           |             |      | mean | σ    | mean | σ  | mean           | σ   | mean | σ   |
| LABS      | Winter      | 31   | 1.73 | 0.27 | 24   | 9  | 36.2           | 7   | 5.9  | 2.8 |
| LABS      | Spring      | 29   | 2.2  | 0.26 | 27   | 18 | 52.9           | 5.3 | 8.5  | 2.7 |
| LABS      | Summer      | 29   | 1.43 | 0.13 | 15   | 20 | 22.2           | 5   | 14.2 | 1.6 |
| LABS      | Fall        | 14   | 1.7  | 0.15 | 11   | 5  | 29.2           | 6.8 | 13.2 | 3.5 |
| MBO       | Spring      | 183  | 1.6  | 0.17 | 32   | 46 | 48.7           | 8.1 | 3.6  | 1.1 |
| MBO       | Summer      | 80   | 1.44 | 0.1  | 44   | 45 | 42.4           | 8.3 | 5    | 1.5 |
| DRI       | Winter      | 214  | 1.73 | 0.57 | 14   | 16 | --             | --  | 3.1  | 1   |
| DRI       | Spring      | 189  | 1.6  | 0.26 | 25   | 22 | --             | --  | 3.5  | 1   |
| DRI       | Summer      | 159  | 1.36 | 0.35 | 68   | 42 | 49.2           | 9.6 | 4.4  | 1.3 |
| DRI       | Fall        | 143  | 1.66 | 0.38 | 39   | 26 | --             | --  | 3.6  | 1   |
| NV02      | Summer      | 64   | 1.79 | 1.12 | 32   | 16 | 40.1           | 6.2 | 4.5  | 2   |
| SPL       | Spring      | 32   | 1.59 | 0.19 | 27   | 22 | 44.9           | 7.4 | 3.9  | 0.8 |
| SPL       | Summer      | 25   | 1.59 | 0.21 | 34   | 22 | 36.7           | 8   | 4.6  | 1.1 |
| All-Sites | All Seasons | 1206 | 1.65 | 0.32 | 30   | 24 | 40.3           | 7.2 | 6    | 1.6 |

#### WV Filtered Observations

| Location  | Season      | N   | GEM  |      | RM   |    | O <sub>3</sub> |     | WV   |     |
|-----------|-------------|-----|------|------|------|----|----------------|-----|------|-----|
|           |             |     | mean | σ    | mean | σ  | mean           | σ   | mean | σ   |
| LABS      | Winter      | 25  | 1.71 | 0.29 | 25   | 9  | 37.7           | 6   | 5    | 2.4 |
| LABS      | Spring      | 23  | 2.21 | 0.28 | 31   | 18 | 52.4           | 5.1 | 7.6  | 2.2 |
| LABS      | Summer      | 23  | 1.42 | 0.12 | 15   | 20 | 22             | 5.1 | 14.1 | 1.5 |
| LABS      | Fall        | 11  | 1.7  | 0.15 | 11   | 5  | 29.2           | 6.8 | 13.2 | 3.5 |
| MBO       | Spring      | 146 | 1.62 | 0.16 | 33   | 47 | 50.7           | 7.2 | 3.1  | 0.8 |
| MBO       | Summer      | 64  | 1.4  | 0.11 | 64   | 49 | 45.8           | 7.6 | 3.7  | 0.7 |
| DRI       | Winter      | 171 | 1.79 | 0.55 | 17   | 17 | --             | --  | 2.7  | 0.6 |
| DRI       | Spring      | 151 | 1.6  | 0.25 | 27   | 24 | --             | --  | 3.1  | 0.6 |
| DRI       | Summer      | 127 | 1.28 | 0.29 | 76   | 45 | 50.6           | 9.1 | 3.7  | 0.8 |
| DRI       | Fall        | 114 | 1.66 | 0.37 | 44   | 27 | --             | --  | 3.2  | 0.6 |
| NV02      | Summer      | 51  | 1.55 | 0.71 | 34   | 17 | 40.6           | 5.7 | 3.7  | 1.2 |
| SPL       | Spring      | 26  | 1.59 | 0.21 | 28   | 21 | 46.2           | 6.7 | 3.7  | 0.7 |
| SPL       | Summer      | 20  | 1.57 | 0.23 | 42   | 20 | 38.2           | 6.8 | 4.1  | 0.8 |
| All-Sites | All Seasons | 908 | 1.62 | 0.29 | 34   | 25 | 41.3           | 6.6 | 5.5  | 1.3 |

Table SI-1 Continued:

## GEOS Chem Standard Model

| Location  | Season      | N    | GEM  |          | RM   |          | O <sub>3</sub> |          | WV   |          |
|-----------|-------------|------|------|----------|------|----------|----------------|----------|------|----------|
|           |             |      | mean | $\sigma$ | mean | $\sigma$ | mean           | $\sigma$ | mean | $\sigma$ |
| LABS      | Winter      | 31   | 1.77 | 0.18     | 142  | 59       | 52.6           | 7.1      | 3.7  | 2.6      |
| LABS      | Spring      | 29   | 2.1  | 0.27     | 87   | 31       | 52.9           | 5.2      | 6.5  | 2.7      |
| LABS      | Summer      | 24   | 1.61 | 0.06     | 21   | 17       | 32.2           | 10       | 9.9  | 2        |
| LABS      | Fall        | 11   | 1.89 | 0.15     | 36   | 24       | 46.8           | 6.7      | 10.3 | 1.2      |
| MBO       | Spring      | 188  | 1.84 | 0.14     | 111  | 55       | 51.2           | 8.9      | 1.6  | 0.9      |
| MBO       | Summer      | 84   | 1.67 | 0.09     | 135  | 58       | 50.9           | 11.6     | 2.3  | 1.2      |
| DRI       | Winter      | 204  | 1.87 | 0.13     | 57   | 35       | --             | --       | 1.6  | 0.8      |
| DRI       | Spring      | 166  | 1.91 | 0.11     | 69   | 36       | --             | --       | 2.1  | 0.8      |
| DRI       | Summer      | 177  | 1.7  | 0.08     | 72   | 29       | 52.3           | 7.4      | 3    | 1.1      |
| DRI       | Fall        | 154  | 1.74 | 0.08     | 63   | 28       | --             | --       | 2.3  | 0.9      |
| NV02      | Summer      | 77   | 1.76 | 0.07     | 62   | 21       | 48.1           | 7.2      | 3    | 1.1      |
| SPL       | Spring      | 32   | 1.79 | 0.14     | 116  | 41       | 57.9           | 4.7      | 1.4  | 0.3      |
| SPL       | Summer      | 29   | 1.71 | 0.09     | 119  | 43       | 60.4           | 4.8      | 1.9  | 0.7      |
| All-Sites | All Seasons | 1206 | 1.8  | 0.12     | 84   | 37       | 50.5           | 7.4      | 3.8  | 1.3      |

Table S-2: Interspecies correlation statistics by site and season. N is the number of daily means used in the calculations and P < 0.05 indicates a significant correlation according to ANOVA analysis. Observations were filtered according to the WV cutoff described in the text. Units for slopes are: RM:GEM = pg ng<sup>-1</sup>, RM: O<sub>3</sub> = pg m<sup>-3</sup> ppbv<sup>-1</sup>, RM:WV = pg m<sup>-3</sup> g<sup>-1</sup> kg

| Site | Season | Parameter | RM:GEM |       | RM:O <sub>3</sub> |       | RM:WV |       |
|------|--------|-----------|--------|-------|-------------------|-------|-------|-------|
|      |        |           | Obs    | Model | Obs               | Model | Obs   | Model |
| LABS | Winter | N         | 25     | 31    | 22                | 31    | 25    | 31    |
|      |        | R         | -0.27  | -0.68 | -0.05             | 0.93  | -0.37 | -0.77 |
|      |        | Slope     | -8.7   | -219  | 0.12              | 8     | -1.5  | -17   |
|      |        | Intercept | 40     | 529   | 21                | -260  | 33    | 207   |
|      |        | P < 0.05? | no     | yes   | no                | yes   | no    | yes   |
| LABS | Spring | N         | 23     | 29    | 23                | 29    | 23    | 29    |
|      |        | R         | -0.45  | 0.03  | -0.06             | 0.76  | -0.87 | -0.72 |
|      |        | Slope     | -29    | 3.6   | -0.21             | 4.5   | -7.1  | -8    |
|      |        | Intercept | 95     | 79    | 43                | -149  | 86    | 140   |
|      |        | P < 0.05? | yes    | no    | no                | yes   | yes   | yes   |
| LABS | Summer | N         | 23     | 24    | 23                | 24    | 23    | 24    |
|      |        | R         | -0.64  | 0.57  | 0.02              | 0.62  | -0.85 | -0.5  |
|      |        | Slope     | -107   | 146   | 0.09              | 1     | -11   | -4.2  |
|      |        | Intercept | 167    | -215  | 13                | -12   | 176   | 63    |
|      |        | P < 0.05? | yes    | yes   | no                | yes   | yes   | yes   |
| LABS | Fall   | N         | 11     | 11    | 11                | 11    | 11    | 11    |
|      |        | R         | -0.44  | -0.02 | -0.36             | 0.37  | 0.05  | -0.77 |
|      |        | Slope     | -16    | -3.7  | -0.29             | 1.3   | 0.07  | -15   |
|      |        | Intercept | 39     | 42    | 20                | -27   | 10    | 192   |
|      |        | P < 0.05? | no     | no    | no                | no    | no    | yes   |

Table S-2 cont.

| Site | Season | Parameter | RM:GEM |       | RM:O <sub>3</sub> |       | RM:WV |       |
|------|--------|-----------|--------|-------|-------------------|-------|-------|-------|
|      |        |           | Obs    | Model | Obs               | Model | Obs   | Model |
| MBO  | Spring | N         | 146    | 188   | 146               | 188   | 146   | 187   |
|      |        | R         | -0.44  | -0.53 | 0.14              | 0.82  | 0.17  | -0.52 |
|      |        | Slope     | -129   | -205  | 0.88              | 5.1   | 10    | -31   |
|      |        | Intercept | 242    | 487   | -12               | -148  | 1.4   | 160   |
|      |        | P < 0.05? | yes    | yes   | no                | yes   | yes   | yes   |
| MBO  | Summer | N         | 64     | 84    | 64                | 84    | 64    | 84    |
|      |        | R         | -0.7   | -0.42 | 0.43              | 0.85  | -0.44 | -0.65 |
|      |        | Slope     | -316   | -270  | 2.5               | 4.2   | -19   | -30   |
|      |        | Intercept | 501    | 587   | -60               | -79   | 134   | 204   |
|      |        | P < 0.05? | yes    | yes   | yes               | yes   | yes   | yes   |

Table S-2 cont.

| Site | Season | Parameter | RM:GEM |       | RM:O <sub>3</sub> |       | RM:WV |       |
|------|--------|-----------|--------|-------|-------------------|-------|-------|-------|
|      |        |           | Obs    | Model | Obs               | Model | Obs   | Model |
| DRI  | Winter | N         | 171    | 244   | --                | --    | 171   | 153   |
|      |        | R         | 0.44   | -0.57 | --                | --    | -0.44 | -0.5  |
|      |        | Slope     | 14     | -207  | --                | --    | -11   | -15   |
|      |        | Intercept | -7     | 424   | --                | --    | 47    | 100   |
|      |        | P < 0.05? | yes    | yes   | --                | --    | yes   | yes   |
| DRI  | Spring | N         | 151    | 276   | --                | --    | 151   | 184   |
|      |        | R         | 0.14   | -0.64 | --                | --    | -0.05 | -0.29 |
|      |        | Slope     | 13     | -205  | --                | --    | -1.5  | -13   |
|      |        | Intercept | 5      | 46    | --                | --    | 31    | 99    |
|      |        | P < 0.05? | no     | yes   | --                | --    | no    | yes   |
| DRI  | Summer | N         | 127    | 276   | 48                | 63    | 127   | 184   |
|      |        | R         | -0.05  | -0.44 | 0                 | 0.27  | -0.45 | -0.59 |
|      |        | Slope     | -8.4   | -167  | 0.01              | 1.3   | -27   | -15   |
|      |        | Intercept | 86     | 357   | 111               | 11.6  | 174   | 122   |
|      |        | P < 0.05? | no     | yes   | no                | yes   | yes   | yes   |
| DRI  | Fall   | N         | 114    | 244   | --                | --    | 115   | 153   |
|      |        | R         | 0.13   | -0.57 | --                | --    | 0.04  | -0.5  |
|      |        | Slope     | 9      | -207  | --                | --    | 2     | -15   |
|      |        | Intercept | 29     | 424   | --                | --    | 38    | 100   |
|      |        | P < 0.05? | no     | yes   | --                | --    | no    | yes   |

Table S-2 Cont.

| Site | Season | Parameter | RM:GEM |       | RM:O <sub>3</sub> |       | RM:WV |       |
|------|--------|-----------|--------|-------|-------------------|-------|-------|-------|
|      |        |           | Obs    | Model | Obs               | Model | Obs   | Model |
| NV02 | Spring | N         | 51     | 77    | 51                | 77    | 51    | 77    |
|      |        | R         | -0.5   | -0.34 | 0.38              | 0.35  | -0.67 | -0.64 |
|      |        | Slope     | -28    | -110  | 1.2               | 1.1   | -9.8  | -13   |
|      |        | Intercept | 75     | 256   | -13               | 11    | 70    | 100   |
|      |        | P < 0.05? | yes    | yes   | yes               | yes   | yes   | yes   |

Table S-2 cont.

| Site | Season | Parameter | RM:GEM |       | RM:O <sub>3</sub> |       | RM:WV |       |
|------|--------|-----------|--------|-------|-------------------|-------|-------|-------|
|      |        |           | Obs    | Model | Obs               | Model | Obs   | Model |
| SPL  | Spring | N         | 26     | 33    | 26                | 33    | 26    | 33    |
|      |        | R         | -0.59  | -0.83 | -0.14             | 0.28  | -0.33 | -0.27 |
|      |        | Slope     | -60    | -237  | -0.44             | 2.5   | -10   | -32   |
|      |        | Intercept | 124    | 541   | 48                | -30   | 66    | 162   |
|      |        | P < 0.05? | yes    | yes   | no                | no    | no    | no    |
| SPL  | Summer | N         | 20     | 31    | 20                | 31    | 20    | 31    |
|      |        | R         | -0.56  | -0.76 | 0.46              | 0.44  | -0.33 | -0.68 |
|      |        | Slope     | -88    | -362  | 1.4               | 4     | -8    | -43   |
|      |        | Intercept | 175    | 737   | -10               | -121  | 74    | 201   |
|      |        | P < 0.05? | yes    | yes   | yes               | yes   | no    | yes   |

Figure S-1: Maps of regions around study sites (green stars) in Taiwan and North America.

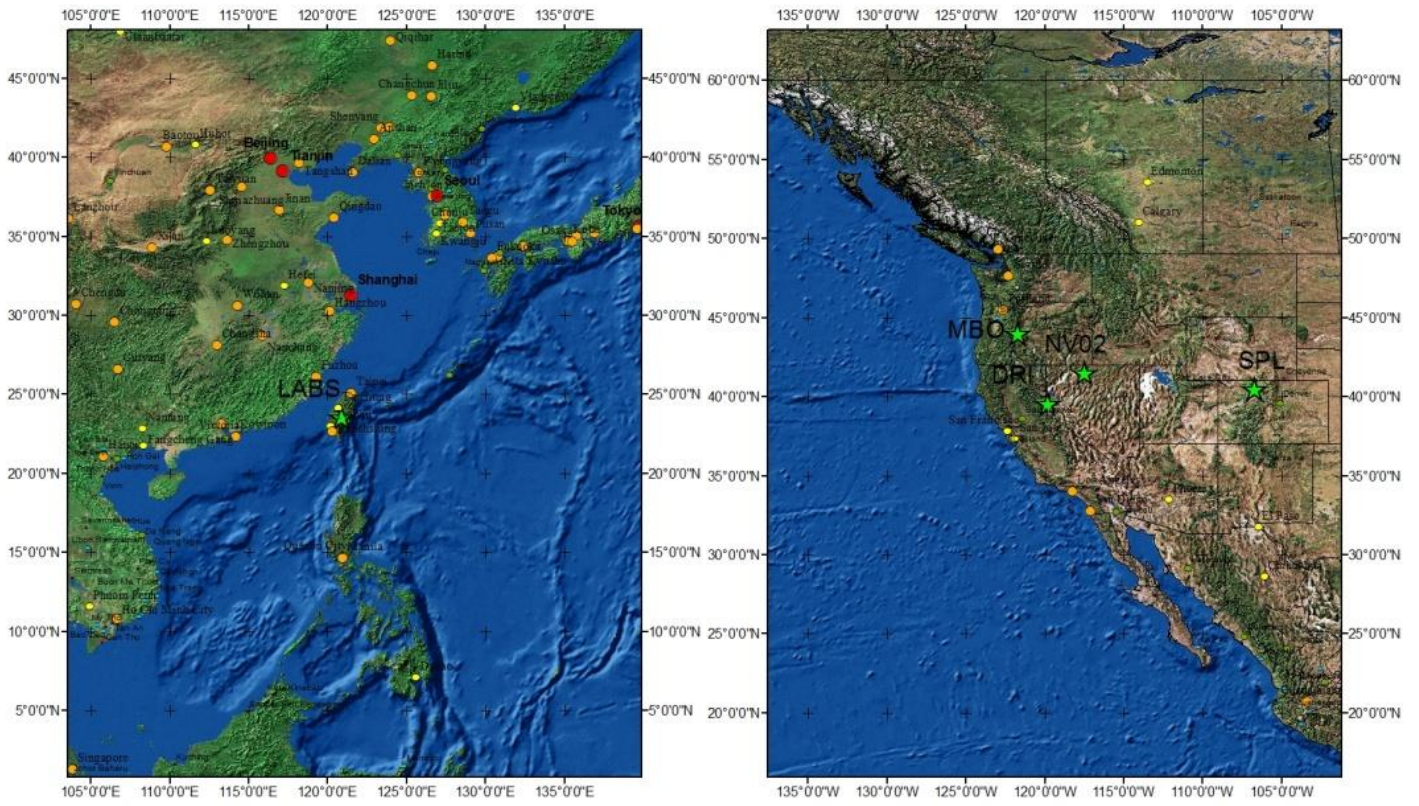



Figure S-2: Upper air forecast maps for June 21, 2007 (A) and June 24, 2007 (B) for the contiguous U.S., which revealed a large scale subsidence event that was consistent with the source of the RM having been conversion of GEM in the FT. On June 21 at 300 mbar a ridge was off shore of the Pacific Northwest and subsidence characterized by low RH between 1000 and 500 mbar extended from southern California northward through southern Washington, thus impacting MBO (Figure SI-2A). By June 24, the ridge at 300 mbar and the center of subsidence as indicated by RH fields had moved eastward to impact the sites in Nevada (Figure SI-2B). For each set of 4-panels in A and B, the two upper left panels show 850 mbar temperature, height, and wind vector fields, the two upper right panels show the 300 mbar wind fields, the two lower left panels show sea level pressure, and two lower right panels show 1000-500 mbar integrated relative humidity and lifted index fields. Images from <http://weather.unisys.com>.

A

B

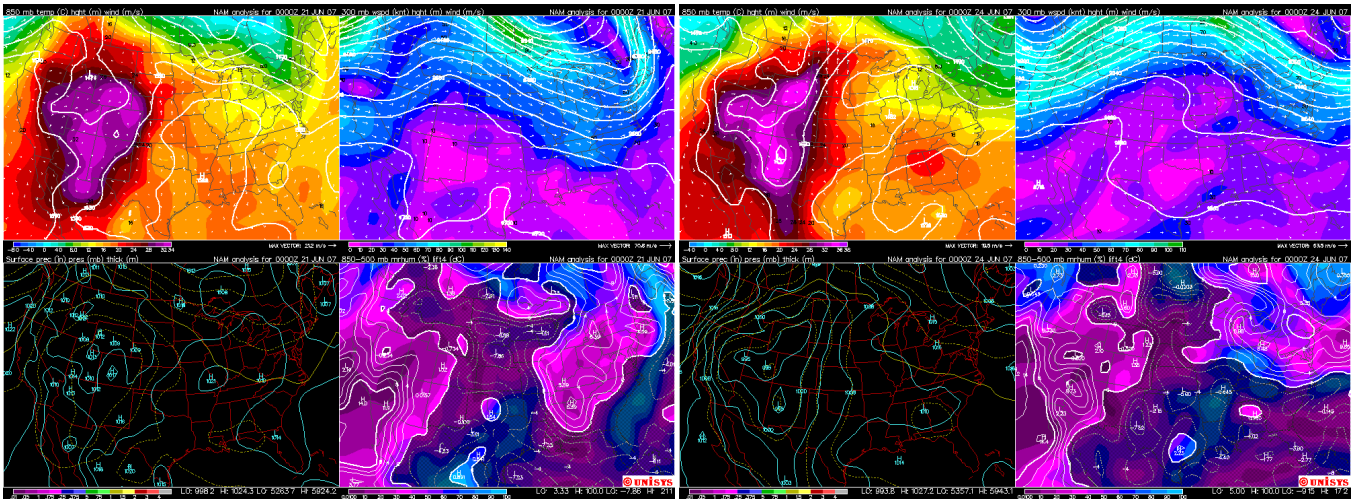

Figure S-3: Gridded frequency distributions (GFDs) of 120-hr HYSPLIT back trajectories with input meteorology from the National Centers for Environmental Prediction (NCEP) reanalysis data, for RGM events observed in sequence at MBO, DRI, and NV02 (times UTC). Gridded frequency distributions were generated by averaging the number of trajectory points in a  $1^{\circ} \times 1^{\circ}$  grid cell over the domain of interest. Location probability represents the fraction of trajectory points in a given cell relative to the number of trajectory points in the most populated cell (Gustin et al., 2012). For each trajectory point, the modeled altitude was compared against that of the planetary boundary layer. The colors show relative horizontal position probabilities of the trajectory points initialized by the times given above each plot and 9 starting locations in a  $0.5 \times 0.5^{\circ}$  grid with altitudes of 500, 1000, 1500, and 2000 m agl. Left panels show entire distribution of trajectory points over all altitudes 5-days backward in time, center panels shows close-up views of the event, and right panels depict those grid cells in brown that have  $> 10\%$  of trajectory points below the modeled boundary layer (termed "Boundary Layer"). At each site these plots show general transport from west to east. The GFDs suggest that two air streams merged upwind of each site: a branch in the BL from the north, and a branch in the FT from more southerly directions. At each site the trajectories are consistent with the forecast maps in showing recently ( $< 1$  day) subsided air, which is indicated by one or more grid cells in the GFDs with the maximum location probability (colored red) still remaining after the grid cells were identified with  $> 10\%$  of points below the modeled boundary layer (colored brown).

Figure S-3

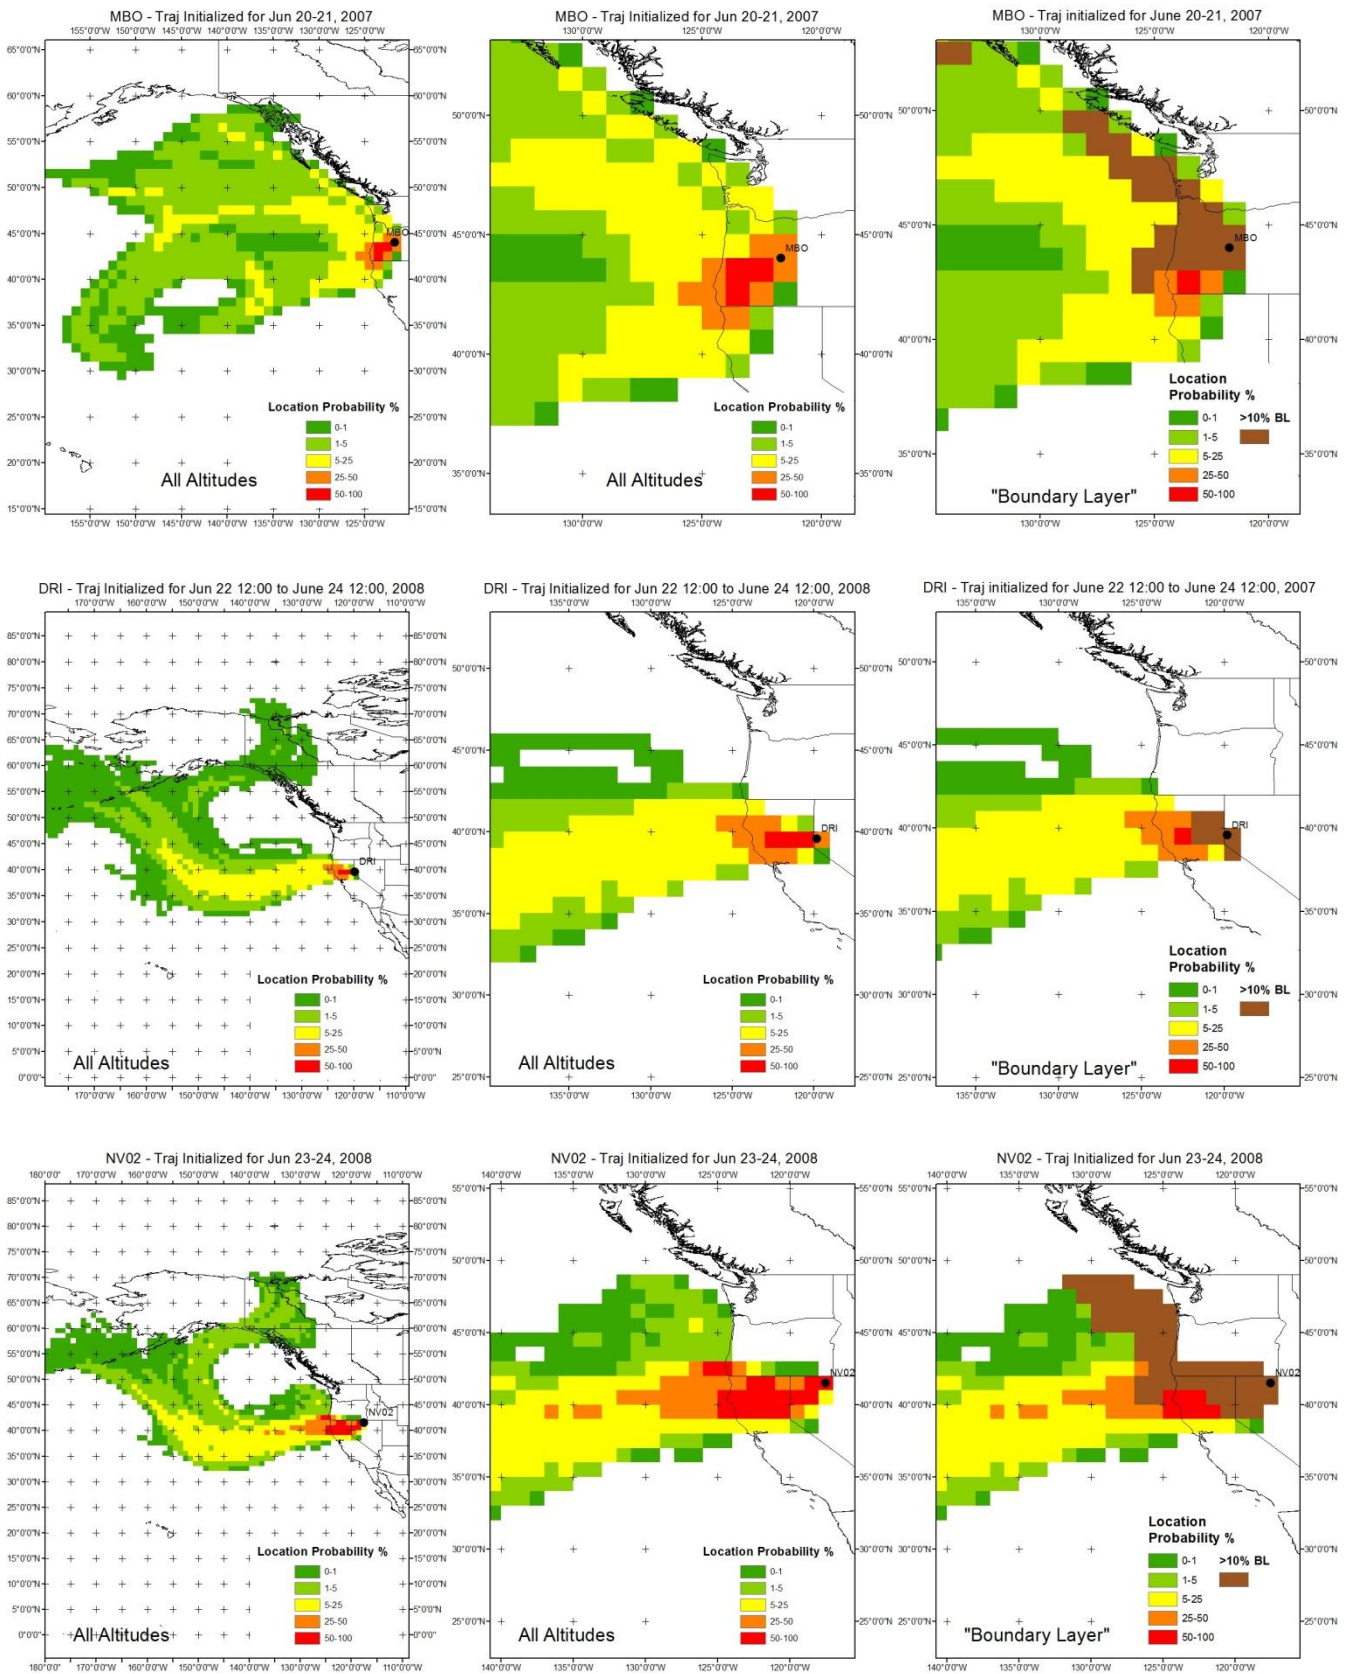

Supplement: Supplementary file 1 [file acp-15-1161-2015-supplement.pdf]
